# Supplementary material
Source: PubMed Central journal article supplement (PMC7094098)
Supplement: mmc1.pdf [file mmc1.pdf]

# Modeling the Skip-and-resurgence of Japanese Encephalitis Epidemics in Hong Kong

Shi Zhao, Yijun Lou, Alice P.Y. Chiu & Daihai He\*

Department of Applied Mathematics, Hong Kong Polytechnic University, Hong Kong (SAR) China

\* Correspondence to D.H.: [daihai.he@polyu.edu.hk](mailto:daihai.he@polyu.edu.hk)

May 17, 2018

## 1 Contents

|   |                                                                        |          |
|---|------------------------------------------------------------------------|----------|
| 2 | <b>S1 More Fitting Results Under Different Scenarios</b>               | <b>2</b> |
| 3 | S1.1 Baseline fitting results . . . . .                                | 2        |
| 4 | S1.2 Fitting results of partitioned spill-over rate $\rho$ . . . . .   | 3        |
| 5 | S1.3 Fitting results of partitioned force of infection . . . . .       | 3        |
| 6 | <b>S2 Further Reasoning on Model Parameters and Structure</b>          | <b>4</b> |
| 7 | S2.1 Initial proportions of $I_{p0}$ , $E_{p0}$ and $C_{p0}$ . . . . . | 4        |
| 8 | S2.2 Further Reasoning on Model Structure . . . . .                    | 7        |
| 9 | S2.3 $\mathcal{R}_0$ and CCS after New JEV Invasion . . . . .          | 8        |

# Supplementary Information

## S1 More Fitting Results Under Different Scenarios

### S1.1 Baseline fitting results

In this case, the force of infection from mosquitoes to pigs is set as

$$\lambda_{vp} = k \cdot \omega(t) + b,$$

where  $\omega$  is the time series of ovitrap index in Hong Kong,  $k$  and  $b$  are model parameters under estimation. The baseline fitting results of the model are shown in Fig S1. Estimated results of model parameters are in Table S1.

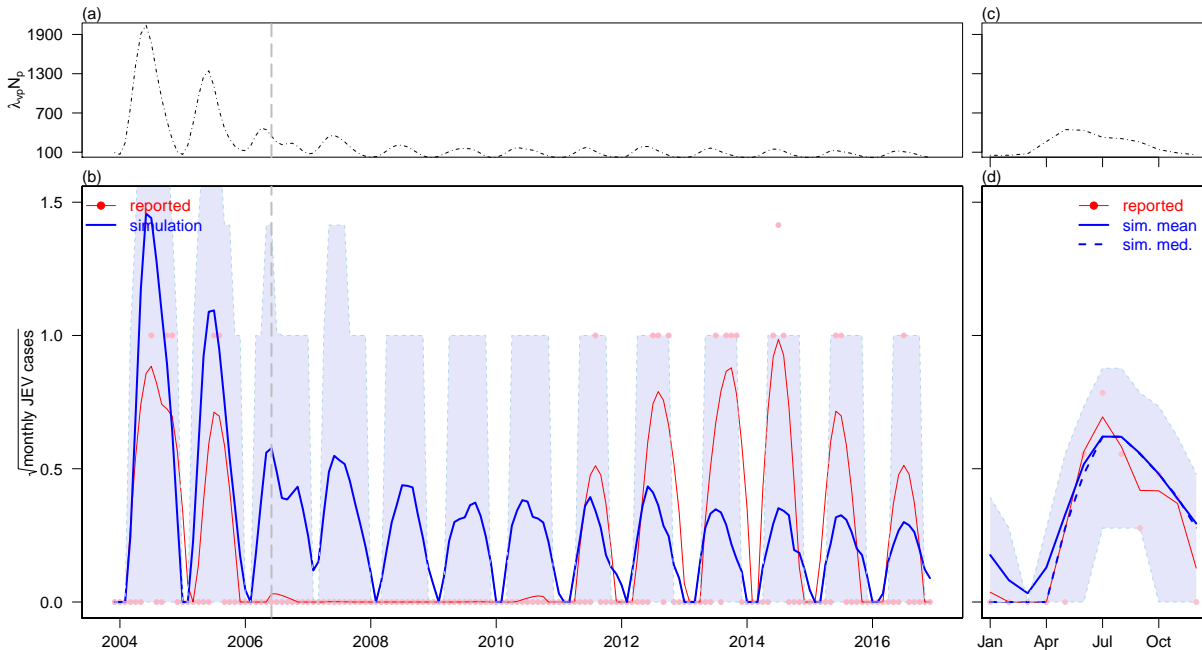

Figure S1: Fitting results of JEV local cases in Hong Kong from 2004 to 2016 under baseline (i.e., no invasion) scenario. Panel (a) and (b) are the scaled force of infection (from vectors to pigs, scaled by the population size of pigs) and simulation results from 2004 to 2016 respectively. Panel (c) and (d) are the one-year-average scaled force of infection and simulation results from 2004 to 2016 respectively. In panel (a) and (b), black dashed lines are the scaled force of infection. In panel (b) and (d), blue lines are the simulation results, shaded regions are 95% quantile interval from simulation, pink dots are the reported (i.e., observed) JEV local cases and red lines are the smoothed (by *loess* function) reported JEV cases. The vertical grey dashed line marks the time point when Hong Kong government triggered the pig rearing licences surrender policy.

Table S1: Summary table of model parameters' estimates under baseline (i.e., no invasion) scenario.  $X_{p0}$  denotes the initial proportion of class  $X_p$ .

| Parameter                  | Notation                       | Value    | Type      | Initial status | Unit     |
|----------------------------|--------------------------------|----------|-----------|----------------|----------|
| Average force of infection | $\langle \lambda_{vp} \rangle$ | 0.0019   | estimated | time-dependent | per year |
| Pig latent period          | $\sigma_p^{-1}$                | 1.5      | fixed     | 1-2            | days     |
| Pig infection period       | $\gamma_p^{-1}$                | 3        | fixed     | 2-4            | days     |
| Pig convalescent period    | $\delta_p^{-1}$                | 2.5      | fixed     | 1-4            | days     |
| Imported infection ratio   | $\eta$                         | 1.0%     | fixed     | 0.43%-1.45%    | Nil      |
| Effective contact rate     | $\beta_p$                      | 0.0098   | estimated | 0.0-0.4        | per days |
| Pig living period          | $\nu_p^{-1}$                   | 234      | fixed     | 234            | days     |
| Pig population             | $N_p$                          | -        | -         | time-dependent | pigs     |
| Average spill over ratio   | $\langle \rho \rangle$         | 0.0008   | estimated | time-dependent | Nil      |
| Average ovttrap index      | $\langle \omega \rangle$       | 0.0564   | given     | time-dependent | Nil      |
| Initial susceptible        | $S_{p0}$                       | 0.5847   | estimated | 45-75%         | Nil      |
| Initial exposed            | $E_{p0}$                       | 0.001    | assumed   | 0.0-0.25%      | Nil      |
| Initial infectious         | $I_{p0}$                       | 0.001    | assumed   | 0.0-0.25%      | Nil      |
| Initial convalescent       | $C_{p0}$                       | 0.001    | assumed   | 0.0-0.25%      | Nil      |
| Initial recovered          | $R_{p0}$                       | 0.3123   | estimated | 25-55%         | Nil      |
| BIC                        | BIC                            | 168.7009 | estimated | -              | Nil      |

## S1.2 Fitting results of partitioned spill-over rate $\rho$

This model scenario is associated with explanation **I3**. For partitioned  $\rho$ , we assume  $\rho$  is increased after new strain invasion as:

$$\rho = \begin{cases} \xi_1 \cdot \omega(t - \tau), & t < T_0 \\ \xi_2 \cdot \omega(t - \tau), & t \geq T_0 \end{cases}$$

where  $\tau$  is the time delay and  $T_0$  is the starting time instant when new JEV strain joined the system.

The fitting results of the new JEV strain invasion scenario with increased  $\lambda_{vp}$  and  $\rho$  after invasion are shown in Fig S2. Estimated results of model parameters are in Table S2. The estimate of  $\mathcal{R}_{pp}$  is 0.026 (95% C.I.: [0.00,0.30]) under this scenario (see Fig S3).

## S1.3 Fitting results of partitioned force of infection

This model scenario is associated with explanation **I2**. In this case, fixing the spill-over ratio, we assume the force of infection under new JEV strain invasion scenario is

$$\lambda_{vp} = \begin{cases} k_1 \cdot \omega(t) + b, & t < T_0 \\ k_2 \cdot \omega(t) + b, & t \geq T_0 \end{cases}$$

where  $T_0$  is the starting time instant when new JEV strain joined the system. The situation with no invasion of new strains can be regarded as the special case that  $k_1 = k_2$ .

The fitting results of the new JEV strain invasion scenario with variable force of infection are shown in Fig S4. Estimated results of model parameters are in Table S3. The estimate

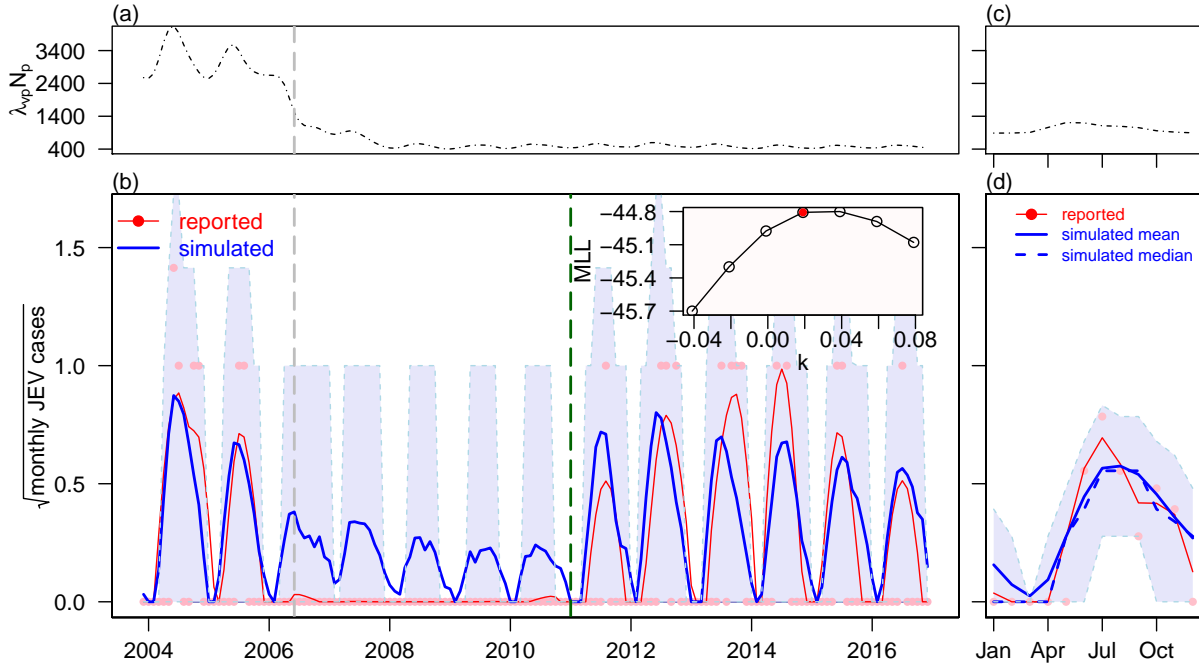

Figure S2: Model fitting results of JEV local cases under the new strain invasion scenario from 2004 to 2016 in Hong Kong. Panels (a) and (b) are the re-scaled force of infection from vectors to pigs, normalized by the pig population sizes and their simulated results, both from 2004 to 2016. Panels (c) and (d) are the one-year average re-scaled force of infection and their simulated results from 2004 to 2016. In panels (a) and (b), black dashed lines are the scaled force of infection. In panels (b) and (d), blue lines are the simulated results, shaded regions are the simulated 95% quantile interval. Pink dots are the observed JEV local cases and red lines are the smoothed observed JEV cases using the *LOESS* function. The vertical grey dashed line is the time where the pig rearing license surrendering policy was implemented. The vertical dark green line is the time when the new strain invasion occurs. The model scenario is associated with explanation **I1**.

32 of  $\mathcal{R}_{pp}$  is 0.0053 (95% C.I.: [0.00,0.31]) under the invasion scenario with partitioned force of  
 33 infection (see Fig (S5)).

## 34 **S2 Further Reasoning on Model Parameters and Structure**

### 35 **S2.1 Initial proportions of $I_{p0}$ , $E_{p0}$ and $C_{p0}$**

37 The proposed modelling framework is relatively novel thus it is difficult to find the exact  
 38 value of these three values in previous research of pigs. The initial proportions of  $E_{p0}$ ,  $I_{p0}$   
 39 and  $C_{p0}$  is assumed to be equal for simplicity. Here is the justification. The average period of  
 40 staying in  $E_p$ ,  $I_p$  or  $C_p$  is  $(1.5 + 3.0 + 2.5)/3 = 7/3$  days (see Table 1 for the parameter values).  
 41 Then, if a pig is assumed to be infected during its living period and we randomly select one day,

Table S2: Summary table of parameter estimation under new JEV strain invasion scenario with variable  $\rho$ .  $X_{p0}$  denotes the initial proportion of class  $X_p$ .

| Parameters                          | Notations                     | Values   | Types     | Initial status | Units/Remarks   |
|-------------------------------------|-------------------------------|----------|-----------|----------------|-----------------|
| Average force of infection          | $\langle\lambda_{vp}\rangle$  | 0.0042   | estimated | time-dependent | per year        |
| Latent period of pigs               | $\sigma_p^{-1}$               | 1.5      | fixed     | 1-2            | days            |
| Infection period of pigs            | $\gamma_p^{-1}$               | 3        | fixed     | 2-4            | days            |
| Convalescent period of pigs         | $\delta_p^{-1}$               | 2.5      | fixed     | 1-4            | days            |
| Infection ratio among imported pigs | $\eta$                        | 1.0%     | fixed     | 0.43%-1.45%    | Nil             |
| Effective contact rate              | $\beta_p$                     | 0.0011   | estimated | 0.0-0.4        | per days        |
| Lifespan of pigs                    | $\nu_p^{-1}$                  | 234      | fixed     | 234            | days            |
| Size of pig population              | $N_p$                         | -        | -         | time-dependent | pigs            |
| Average spill-over ratio            | 2004-10: $\langle\rho\rangle$ | 0.0002   | estimated | time-dependent | before invasion |
| Average spill-over ratio            | 2011-16: $\langle\rho\rangle$ | 0.0024   | estimated | time-dependent | after invasion  |
| Average ovitrap index               | $\langle\omega\rangle$        | 0.0564   | given     | time-dependent | Nil             |
| Initial proportion of susceptible   | $S_{p0}$                      | 0.6818   | estimated | 45-75%         | Nil             |
| Initial proportion of exposed       | $E_{p0}$                      | 0.001    | assumed   | 0.0-0.25%      | Nil             |
| Initial proportion of infectious    | $I_{p0}$                      | 0.001    | assumed   | 0.0-0.25%      | Nil             |
| Initial proportion of convalescent  | $C_{p0}$                      | 0.001    | assumed   | 0.0-0.25%      | Nil             |
| Initial proportion of recovered     | $R_{p0}$                      | 0.3152   | estimated | 25-55%         | Nil             |
| BIC                                 | BIC                           | 140.2633 | estimated | -              | Nil             |

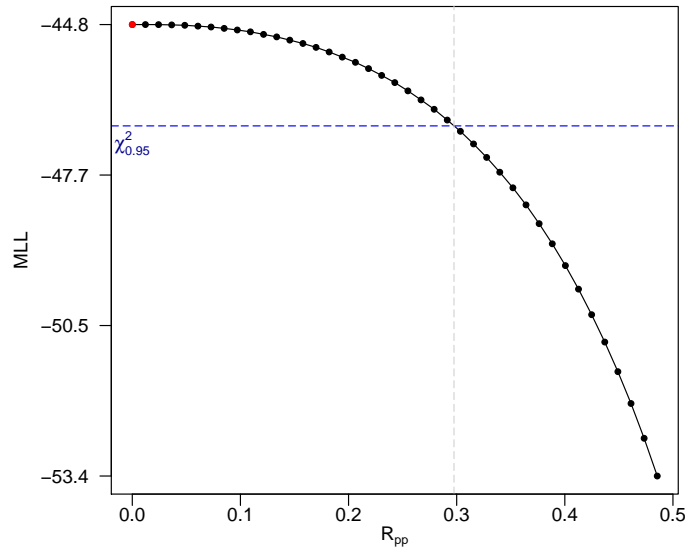

Figure S3: The estimation result of the basic reproduction number of pig-to-pig transmission ( $\mathcal{R}_{pp}$ ) under new JEV strain invasion scenario with both variable  $\lambda_{vp}$  and  $\rho$ . The horizontal blue dashed line is the 95% confidence threshold. The model scenario is associated with explanation **I1**.

42 the probability of “the pig is in  $E_p$ ,  $I_p$  or  $C_p$  on the selected day” is  $p_1 = (7/3)/234 = 0.01$   
43 (where 234 days are the average pigs’ lifespan). According to References, we have  $R_{p0} =$   
44 25% 55% (see Table 1), this implies there is 55%-25%=30%, as a maximum, of locally-reared

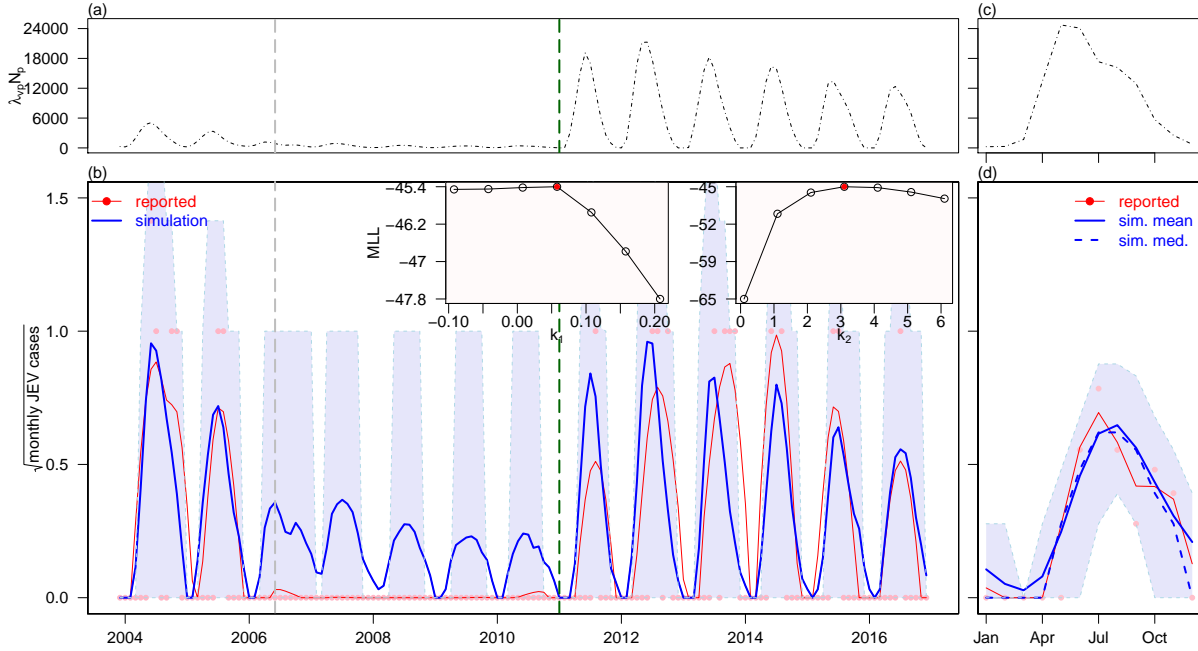

Figure S4: Fitting results of JEV local cases in Hong Kong from 2004 to 2016 under new JEV strain invasion scenario with variable force of infection ( $\lambda_{vp}$ ). Panel (a) and (b) are the scaled force of infection (from vectors to pigs, scaled by the population size of pigs) and simulation results from 2004 to 2016 respectively. Panel (c) and (d) are the one-year-average scaled force of infection and simulation results from 2004 to 2016 respectively. In panel (a) and (b), black dashed lines are the scaled force of infection. In panel (b) and (d), blue lines are the simulation results, shaded regions are 95% quantile interval from simulation, pink dots are the reported (i.e., observed) JEV local cases and red lines are the smoothed (by *loess* function) reported JEV cases. The vertical grey dashed line marks the time point when Hong Kong government triggered the pig rearing licences surrender policy. The vertical dark green dashed line marks the time point when the new JEV strain introduced to the pigs' population. The inset panel shows the maximum log-likelihood (MLL) values of different  $k_1$ s and  $k_2$ s, the red dot with the highest MLL are selected for fitting in main panels. The model scenario is associated with explanation **I2**.

45 pig would be infected annually. Therefore, we have the probability of “a randomly selected  
46 locally-reared pig will be infected during its life time” is  $p_2 = 30\% * (234/365.25) = 0.19$   
47 (where 365.25 days are the average time period of a year). By further assuming the events  
48 of  $p_1$  and  $p_2$  are independent, we have the probability of “a randomly selected locally-reared  
49 pig is infected (i.e., in  $E_p$ ,  $I_p$  or  $C_p$ ) on a randomly select day” is  $p = p_1 p_2 = 0.0019$  (as upper  
50 bound). It is obvious that the lower bounds of  $E_{p0}$ ,  $I_{p0}$  and  $C_{p0}$  are all 0. Hence, we have the  
51 average of upper and lower bounds:  $(0.0019 + 0)/2 = 0.001 = 0.1\%$  as assumed. Furthermore,  
52 as the initial proportions of  $E_{p0}$ ,  $I_{p0}$  and  $C_{p0}$  are believed to be very small, slightly changes  
53 of these three parameters will not affect our main results.

Table S3: Summary table of model parameters' estimates under new JEV strain invasion scenario with variable force of infection ( $\lambda_{vp}$ ).  $X_{p0}$  denotes the initial proportion of class  $X_p$ .

| Parameter                  | Notation                              | Value    | Type      | Initial status | Unit/Remarks    |
|----------------------------|---------------------------------------|----------|-----------|----------------|-----------------|
| Average force of infection | 2004-10: $\langle\lambda_{vp}\rangle$ | 0.0044   | estimated | time-dependent | before invasion |
| Average force of infection | 2011-16: $\langle\lambda_{vp}\rangle$ | 0.1763   | estimated | time-dependent | after invasion  |
| Pig latent period          | $\sigma_p^{-1}$                       | 1.5      | fixed     | 1-2            | days            |
| Pig infection period       | $\gamma_p^{-1}$                       | 3        | fixed     | 2-4            | days            |
| Pig convalescent period    | $\delta_p^{-1}$                       | 2.5      | fixed     | 1-4            | days            |
| Imported infection ratio   | $\eta$                                | 1.0%     | fixed     | 0.43%-1.45%    | Nil             |
| Effective contact rate     | $\beta_p$                             | 0.0022   | estimated | 0.0-0.4        | per days        |
| Pig living period          | $\nu_p^{-1}$                          | 234      | fixed     | 234            | days            |
| Pig population             | $N_p$                                 | -        | -         | time-dependent | pigs            |
| Average spill over ratio   | $\langle\rho\rangle$                  | 0.0003   | estimated | time-dependent | Nil             |
| Average ovitrap index      | $\langle\omega\rangle$                | 0.0564   | given     | time-dependent | Nil             |
| Initial susceptible        | $S_{p0}$                              | 0.5767   | estimated | 45-75%         | Nil             |
| Initial exposed            | $E_{p0}$                              | 0.001    | assumed   | 0.0-0.25%      | Nil             |
| Initial infectious         | $I_{p0}$                              | 0.001    | assumed   | 0.0-0.25%      | Nil             |
| Initial convalescent       | $C_{p0}$                              | 0.001    | assumed   | 0.0-0.25%      | Nil             |
| Initial recovered          | $R_{p0}$                              | 0.4203   | estimated | 25-55%         | Nil             |
| BIC                        | BIC                                   | 141.2743 | estimated | -              | Nil             |

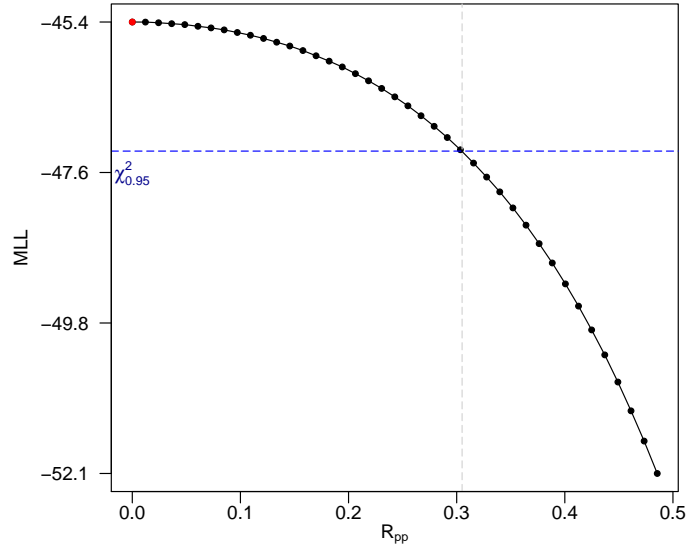

Figure S5: The estimation result of the basic reproduction number of pig-to-pig transmission ( $\mathcal{R}_{pp}$ ) under new JEV strain invasion scenario with variable  $\lambda_{vp}$ . The horizontal blue dashed line is the 95% confidence threshold. The model scenario is associated with explanation **I2**.

## 54 **S2.2 Further Reasoning on Model Structure**

55 **Why to design the model for pig population rather than human?** We list the major  
 56 reasons as follows:

- 57 1. For JEV transmission, human hosts are the incidental and dead-end host of the disease

transmission (since humans can not develop sufficient viraemia to infect mosquitoes).  
However, pigs serve as reservoir for the disease transmission.

2. The human infection risk is proportion to mosquito infections, which is in turn proportion to the infection rate of reservoir, pigs. Thus, by modelling JEV transmission among pigs, human infections can be inferred by using a spill-over rate ( $\rho$ ).
3. Undoubtedly, one can model all of reservoirs, hosts and vectors population explicitly. However, the model would be very complicated, which may lead to over-fitting issue. As we can see, the current model fits the data well, and also simplified the modelling frameworks.

**Why to formulate the vector-free model?** The purpose (at least one major purpose) of the vector (mosquito) population is to keep tracking the mosquito density. However, we found a mosquito index (i.e., the ovitrap index) from observation. Thus we directly use this mosquito index as the replacement of the vector (i.e., mosquito in this work) population. This approach saved us from explicitly modeling the mosquito population. Alternatively, we could have formulate a two-host model with both pig and mosquito. Then we aim to fit simultaneously the observed human cases and the observed mosquito index. That will be a challenging future work.

### S2.3 $\mathcal{R}_0$ and CCS after New JEV Invasion

**New  $\mathcal{R}_0$  and CCS before/after the invasion of the new JEV strain** It is hard to directly estimate the  $\mathcal{R}_0$  with the simplified model (as we avoid model the mosquito and human population explicitly), but we can estimate the percentage change on  $\mathcal{R}_0$  before/after new strain invasion. As we wrote in paragraph “Force of Infection from Vectors to Reservoirs” (from mosquito to pig) in “Parameter Estimation” section,  $\lambda_{vp}$  can be further expressed as  $\lambda_{vp} = a\theta_{vp}I_v/N_p$ . Then, the model is similar to the ODE system proposed in Gao *et al.* [1] by regarding pigs as “host” and mosquito as vector. Biologically, the new (more infective) JEV strain could only increase the transmission probability (i.e.,  $\theta_{vp}$ ) via mosquito bites. Then, the effect of term  $\theta_{vp}$  on  $\mathcal{R}_0$  is equivalent to the terms  $\sqrt{bc}$  in the  $\mathcal{R}_{hv}$  expression at the end of Gao *et al.* [1] (please note that we do not have term  $\lambda_{pv}$  from pig to mosquito in our current model, but as for compensations, our term  $\lambda_{vp}$  covers the effect of the potential term  $\lambda_{pv}$ ). Therefore, the percentage change on term  $\theta_{vp}$  equals to percentage change in  $\lambda_{vp}$ , and the roughly equals to the percentage change in  $\mathcal{R}_0$  (by ignore the effect of pig-to-pig transmission, i.e.,  $\mathcal{R}_{pp}$ , because it is estimated to be very small). According to our estimation in scenario **I3**, the changing fold in  $\lambda_{vp}$  is  $0.0071/0.0043 = 1.65$ . If we presume  $\mathcal{R}_0 = 1.15$  (with CCS around 150,000 in Fig. 8) before invasion, the new  $\mathcal{R}_0 = 1.65 \times 1.15 = 1.90$  (which is out of the bound of current Fig. 8) after new JEV invasion, and the new CCS is around 15,000 (by using Eqn. (10)), which is much less than current local pig population (roughly 60,000). This is likely to explain the mechanism of JEV resurgence in 2011.



## 95 **References**

- 96 [1] Gao D, Lou Y, He D, Porco TC, Kuang Y, Chowell G, et al. Prevention and Control of  
97 Zika as a Mosquito-Borne and Sexually Transmitted Disease: A Mathematical Modeling  
98 Analysis. *Sci Rep.* 2016;6:28070.
